# Supplementary material
Source: MDPI journal article supplement (https://www.mdpi.com/2073-4344/2/3/368)
Supplement: s1 [file s1]

Supplementary Information

**Figure S1.** Selectivity for Paraffins, Olefins, Naphthenes and Aromatics on catalytic cracking.


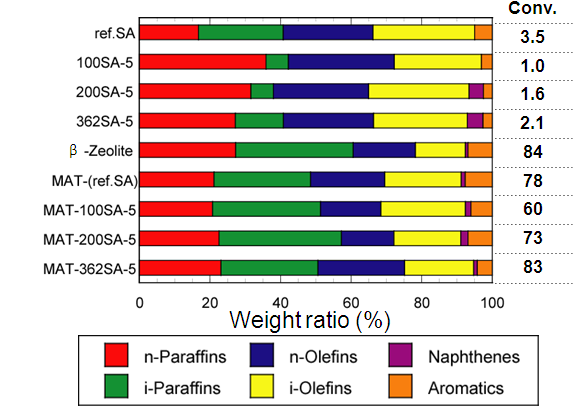


**Figure 2.** Distribution of carbon numbers on catalytic cracking.


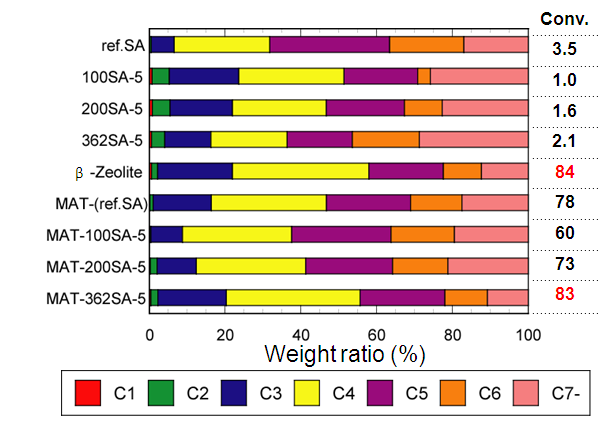


**Table S1.** Amounts of NH3 adsorbed and desorbed and Conversion of catalytic cracking.

| **Catalyst** | **Amount of NH3 adsorbed**  **(10-4 mol/g)** | **Al dispersion**  **(%)** | **Conversion of**  ***n-*dodecane**  **(%)** |
| --- | --- | --- | --- |
| 100SA | 2.0 (1.9)a | 19 | 1.0 |
| 200SA | 3.4 (3.3)a | 33 | 1.6 |
| 362SA | 2.7 (2.3)a | 23 | 2.1 |
| β-Zeolite | 6.2 (8.9)a | 103 | 84 |
| MAT-100SA | 5.1 (4.9)a | 61 | 60 |
| MAT-200SA | 5.3 (4.9)a | 62 | 73 |
| MAT-362SA | 4.1 (4.7)a | 58 | 83 |

a NH3 adsorption**.**

© 2012 by the authors; licensee MDPI, Basel, Switzerland. This article is an open access article distributed under the terms and conditions of the Creative Commons Attribution license (http://creativecommons.org/licenses/by/3.0/).
